# Supplementary material for: Hyaluronic acid plasma levels during high versus low tidal volume ventilation in a porcine sepsis model
Source: PeerJ. 2022 Jan 5;9:e12649. doi: 10.7717/peerj.12649 (PMC8742546; doi:10.7717/peerj.12649)
Supplement: Supplemental Information 2 [file peerj-10-12649-s002.xlsx]

## Sheet: mean arterial Pressure
Mean arterial pressure (mmHg)
no LPS	BLH	1h	2h	3h	4h	5h	6h		LTV	BLH	1h	2h	3h	4h	5h	6h		HTV	BLH	1h	2h	3h	4h	5h	6h
1	110.6	98.03	91.72	89.9	91.11	84.25	74.89		7	83.27	96.47	75.15	68.66	58.42	66.23	54.02		14	83.47	87.32	95.16	78.47	78.11	69.98	75.06
2	86.57	82.01	84.23	96.13	95.79	88.95	78.58		8	94.8	81.22	65.48	66.38	63.37	59.97	60.28		15	108.97	88.71	91.67	71.55	86.11	69.36	49.71
3	112.2	109.895	107.72	105.53	104.15	103.48	103.97		9	64.14	77.185	77.51	65.37	52.9	55.93	59.7		16	81.17	81.13	87.52	58.97	59.97	50.59	47.44
4	89.05	90.84	99.56	95.7	86.16	82.92	75.48		10	96.9	68.93	69.98	65.86	61	58.22	62.08		17	89.05	84.32	78.32	73.15	73.03	67.81	59.34
5	77.75	77.25	77.37	72.79	74.38	74.97	72.825		11	84.99	84.76	83.78	70.01	61.46	65.06	60.97		18	89.91	68.88	75.33	61.22	50.41	54.43	63.8
6	101.51	101.9	104.21	100.88	97.07	100.42	76.3		12	103.96	79.29	77.79	66.83	73.7	73.78	76.74		19	119.08	67.38	67.44	63.71	67.9	68.29	74.02
									13	83.37	74.34	71.65	58.97	58.82	49.97	46.35		20	94.74	72.38	79.91	77.84	75.09	67.48	75.41

## Sheet: Oxigenation ratio
Oxigenation ratio
no LPS	BLH	1h	2h	3h	4h	5h	6h		LTV	BLH	1h	2h	3h	4h	5h	6h		HTV	BLH	1h	2h	3h	4h	5h	6h
1	444.25	430.5	406.5	387.5	438.5	419.75	403.75		7	459	482.75	392.5	382.25	310	298.5	223.75		14	418.75	417	316.25	247.5	213.25	250	212.75
2	534.25	478	512.25	401	486	481	485.75		8	431	379.5	304.25	292.25	212.5	161	180		15	488.75	460.25	376	325	252.25	237.5	183.818
3	508	422	384.5	417.25	438.25	420.5	448		9	377.75	387	282.25	200	354.25	238.75	181.75		16	380.25	377	363	319	257.5	253.5	249.25
4	475	455.5	463.75	464.5	466.5	437.5	479		10	478	368.75	201.8	171.667	271.2	221.5	210.2		17	406.5	350.75	359.5	331	269.25	203.5	90.4706
5	375.75	378.5	354.25	456.5	452.75	430.75	412.5		11	296	228.75	165.8	187	220.5	224.167	224.5		18	439.25	377.25	219.25	189.556	203.2	220.4	186.6
6	457.5	445	437.25	459	411.75	425.25	387.25		12	481.5	429.25	311	237	240	234.5	243.25		19	377.5	397	268.25	219.25	209.5	199.75	188.444
									13	473	378.5	176.25	96.889	144.111	235.333	141.333		20	461.25	428.75	288.75	278	282	242.25	218.25

## Sheet: Peak pressure
Peak pressure (cm H2O)
no LPS	BLH	1h	2h	3h	4h	5h	6h		LTV	BLH	1h	2h	3h	4h	5h	6h		HTV	BLH	1h	2h	3h	4h	5h	6h
1	15.2	15.5	15.7	16.1	16.3	16.6	16.8		7	13.3	13.8	14.3	15.8	16.7	17.8	18.1		14	14.7	22.8	28.2	33.8	32.3	31.1	30.2
2	15.5	15.2	15.2	15.4	15.4	15.5	15.5		8	15.4	16.4	17.9	21.7	20.8	24.2	24.2		15	14	22.1	23.5	26	26.9	25.6	26.2
3	16.1	15.9	15.8	15.8	15.9	16.1	16		9	15.2	16.6	17.9	20.1	24.3	20.2	27		16	17.4	26.6	33.9	29.7	33.8	34.9	37.6
4	16.5	16.7	16.9	16.6	16.6	16.7	16.8		10	17.7	20.1	31	37.3	27.2	30.8	32.9		17	14.3	19.6	22.2	25.9	27.2	28.5	28.8
5	16	16.2	16	16.1	16	16.1	16		11	16.4	18.2	26	30.6	28.9	28.1	27.7		18	16.8	26.8	28.9	32.2	34	32.8	33.3
6	15.9	16	15.9	16	16.1	16.4	16.6		12	17.3	18.6	22.2	23.4	23.6	23.2	23		19	20.1	27.3	32.1	30.8	30.6	30.1	29.5
									13	15.7	17.5	28.8	34.4	31.9	31.3	28.4		20	17.5	28.3	30.9	32.5	33.3	34	33.6

## Sheet: Mean Pressure
Peak pressure (cm H2O)
no LPS	BLH	1h	2h	3h	4h	5h	6h		LTV	BLH	1h	2h	3h	4h	5h	6h		HTV	BLH	1h	2h	3h	4h	5h	6h
1	8.8	8.9	9	9.2	9.3	9.5	9.5		7	8.5	8.7	8.9	9.3	9.5	10	10		14	8.7	10.6	11.85	13.2	12.5	12.2	12.1
2	9.1	9	9	9.1	9.1	9.2	9		8	8.5	8.9	9.4	10.7	10.5	13.5	13.6		15	8.3	10.7	10.9	11.5	11.7	11.5	11.8
3	8.9	8.8	8.8	8.9	8.9	9	9		9	8.5	9	9.5	10.2	15.4	10.3	15.7		16	9.7	11.8	13.7	12.7	13.8	14	14.8
4	8.4	8.6	8.7	8.6	8.6	8.7	8.9		10	9.2	10.1	16.7	22	15.9	16.9	17.4		17	8	10	10.7	11.6	11.9	12.2	12.2
5	8.7	8.8	8.7	8.9	8.8	8.9	8.9		11	9.3	10.3	17.2	21.5	20.1	19.1	19		18	9.2	11.8	12.3	13.1	15	14.3	13.2
6	8.8	8.9	8.8	8.9	8.8	9	9.1		12	9.4	9.8	10.7	11.3	11.6	11.5	11.5		19	9.8	10.4	12.8	12.5	12.4	12.5	12.3
									13	8.5	9.1	16	21.4	20.8	20.7	16.4		20	9.2	12.2	12.8	13.1	13.2	13.4	13.2

## Sheet: Compliance
Compliance (L cm H20-1)
no LPS	BLH	1h	2h	3h	4h	5h	6h		LTV	BLH	1h	2h	3h	4h	5h	6h		HTV	BLH	1h	2h	3h	4h	5h	6h
1	36.73	33.37	31.34	30.48	26.85	24.35	22.82		7	51.51	37.85	32.53	23.84	21.03	23.19	21.43		14	30.54	25.64	18.67	14.37	15.67	16.13	16.55
2	49.66	53.37	46.66	43.32	41.2	39.06	35.94		8	39.83	32.16	24.92	14.41	15.48	15.92	15.6		15	42.8	27.48	26.51	22.44	20.7	21.75	20.86
3	32.95	32.46	33.02	31.64	31.62	31.78	28.25		9	53.49	33.63	26.56	18.58	19.58	14.79	11.21		16	25.205	23.53	19.76	15.23	14.74	14.7	13.49
4	57.13	44.15	44.44	37.85	34.2	30.33	34.7		10	23.92	17.12	10.08	9.36	13.56	10.16	8.31		17	65.11	32.19	27.91	22.35	20.8	19.34	19.49
5	72.19	55.65	57.48	48.15	45.28	39.12	39.69		11	35.23	16.44	13.53	13.86	16.13	15.41	17.36		18	29.46	24.22	20.83	16.91	15.58	15.75	15.35
6	33.61	35.76	32.83	31.31	31.14	27.58	27.21		12	25.94	20.62	13.56	10.9	11.2	11.87	11.95		19	30.86	16.47	15.91	16.93	17.51	18.02	17.93
									13	38.82	27.99	12.44	12.1	14.67	14.46	11.61		20	24.6	20.56	18.54	17.38	16.57	16.35	16.25

## Sheet: PEEP
PEEP (cm H2O)
no LPS	BLH	1h	2h	3h	4h	5h	6h		LTV	BLH	1h	2h	3h	4h	5h	6h		HTV	BLH	1h	2h	3h	4h	5h	6h
1	7.2	7.3	7.4	7.2	7	7.1	6.9		7	8.5	8.1	7.80541	7.6	7	7.1	6.4		14	7.3	4.8	4.9	4.8	4.7	4.6	4.6
2	8.8	8.6	8.2	8.5	8.4	8.2	7.9		8	7.2	7.2	7	6.5	6.4	9.5	9.3		15	7.5	5.3	5.9	5.8	5.3	5.1	5
3	7.6	7.7	7.8	7.5	7.5	7.5	7.3		9	8.3	7.8	7.6	7.7	12.8	5.2	10.2		16	8.3	6.6	6.6	6.1	5	5	4.9
4	8.1	7.9	7.9	7.3	7.1	7	7.2		10	6.7	6.4	11.5	16.9	12.4	12.1	10.2		17	7.9	6.4	5.6	5.1	5.1	5.2	5.2
5	9	8.8	8.5	8.3	8.2	8.1	7.8		11	7.8	5.7	11.7	16.2	16.1	16	16.5		18	7.6	6.7	5.8	5.2	4.6	3.7	3.8
6	7.8	7.7	7.4	7.2	7.2	6.9	6.9		12	7.8	7.6	6.9	5.1	6.4	5.6	6.9		19	7.6	4.7	4.9	4.7	5.3	5.9	4.8
									13	7.2	6.8	11.5	17.2	17.6	17.8	11.8		20	7.4	5.7	6.2	6	6	5.8	5.7

## Sheet: Mean arterial pulmonary pressur
Mean arterial pulmoanry pressure (mmHg)
no LPS	BLH	1h	2h	3h	4h	5h	6h		LTV	BLH	1h	2h	3h	4h	5h	6h		HTV	BLH	1h	2h	3h	4h	5h	6h
1	22.32	24	23.57	22.87	23.79	24.03	28.47		7	22.35	35.93	31.19	36.22	32.82	37.3	39.17		14	21.21	33.91	41.335	48.49	44.52	43.73	47.27
2	20.78	20.25	20.39	22.7	22.47	21.61	23.4		8	21.14	31.65	35.24	42.81	38.83	37.64	40.97		15	22.38	37.44	40.48	45	47.07	46.86	48.4908
3	48.92	24.62	20.36	19.49	24.76	27.43	35.44		9	18.86	21.35	16.37	16.57	27.53	28.13	27.89		16	20.83	27.12	36.91	38.77	37.09	47.03	44.44
4	21.18	16.67	16.54	17.99	17.39	19.76	16.51		10	18.44	49.11	56.31	60.88	58.31	60.76	62.21		17	18.96	27.72	40.49	45.84	47.26	51.39	51.59
5	19.64	21.37	20.82	22.43	20.61	20.86	23.04		11	21.43	29.04	17.39	27.85	29.1	29.86	27.15		18	23.28	39.77	46.94	47.85	42.66	46.59	53.52
6	27	27.09	27.53	28.2	21.55	29.47	28.17		12	26.18	37.27	45.96	43.56	41.4	38.17	36.46		19	24.86	22.28	20.03	16.47	23.63	18.63	19
									13	26.28	37.72	47.97	45.09	46.4	47.64	48.63		20	36.12	39.18	24.3	28.54	26.59	29.38	22.55

## Sheet: Extravascular lung water index
Extravascular lung water index (mL kg-1)
no LPS	BLH	3h	6h		LTV	BLH	3h	6h		HTV	BLH	3h	6h
1	8	9	10		7	11	10	9		14	12	13	11
2	12	12	11		8	12	11	14		15	12	13	17
3	11	12	12		9	9	13	-		16	10	10	16
4	9	11	11		10	11	12	13		17	12	12	18
5	9	10	9		11	11	12	13		18	14	13	14
6	9	9	11		12	11	12	12		19	10	10	11
					13	10	14	20		20	10	13	14

## Sheet: Cardiac output
Cardiac output (l min-1)
no LPS	BLH	3h	6h		LTV	BLH	3h	6h		HTV	BLH	3h	6h
1	3.12	3.21	3.13		7	4.69	3.95	3.28		14	3	2.45	4.65
2	3.83	3.36	2.83		8	3.68	3.3	1.69		15	4.41	2.94	1.44
3	2.86	3.69	2.99		9	3.08	3.27	-		16	3.38	2.23	0.74
4	3.17	3.39	3.08		10	3.04	2.27	1.64		17	3.75	2.9	2.1
5	3.28	3.32	3.52		11	3.2	3.11	2.86		18	3.71	3.07	2.59
6	3.64	3.79	3.64		12	3.66	2.22	3.69		19	4.2	4.7	3.14
					13	4.13	2.35	0.92		20	4.35	2.96	3.95

## Sheet: Systemic vascular resistance in
Systemic vascular resistance index (sec cm-5 m-2)
no LPS	BLH	3h	6h		LTV	BLH	3h	6h		HTV	BLH	3h	6h
1	1690	1151	935		7	685	790	734		14	1313	1138	945
2	931	1262	1292		8	1174	790	1411		15	1134	961	1295
3	1587	1539	1603		9	1008	807			16	996	832	1897
4	1128	1184	951		10	1394	977	1259		17	1072	1064	984
5	1160	993	1175		11	1268	892	909		18	1132	896	1103
6	1100	1193	973		12	1322	1109	822		19	1342	931	993
					13	821	867	1929		20	954	1100	858

[truncated: 5 more sheets: Arterenol  µg kg h , Leucocytes, Thrombocytes, Haemoglobin, Lactate]
