# Supplementary material for: Hyaluronic acid plasma levels during high versus low tidal volume ventilation in a porcine sepsis model
Source: PeerJ. 2022 Jan 5;9:e12649. doi: 10.7717/peerj.12649 (PMC8742546; doi:10.7717/peerj.12649)
Supplement: Supplemental Information 4 [file peerj-10-12649-s004.xlsx]

## Sheet: Central Venous
Hyaluronic Acid Plasma Level (pg ml-1)
no LPS	BLH	3h	6h		LTV	BLH	3h	6h		HTV	BLH	3h	6h
1	295.594	453.608	434.039		7	368.128	4173.65	3190.4		14	256.562	549.895	612.56
2	300.997	375.133	692.919		8	679.85	1548.28	931.75		15	456.34	930.972	664.206
3	440.028	421.428	585.253		9	1084.94	2821.56	3439.96		16	261.073	476.391	3260.91
4	370.729	519.561	671.63		10	662.586	1552.41	3892.3		17	541.653	1895.01	3301.86
5	304.169	350.416	446.201		11	1021.86	844.88	1478.98		18	393.967	844.777	929.35
6	457.009	527.201	589.52		12	614.24	1867.98	1493.15		19	1153.11	1052.9	3373.29
					13	556.405	920.398	1771.44		20	461.673	793.351	1076.61

## Sheet: Pulmonary Artery
hyaluronic acid (pg ml-1)
no LPS	BLH	3h	6h		LTV	BLH	3h	6h		HTV	BLH	3h	6h
1	250.994	361.128	408.184		7	404.264	3224.28	3166.35		14	328.364	669.753	707.594
2	279.327	317.283	669.44		8	668.53	1381	803.459		15	294.093	739.418	645.422
3	371.399	377.081	658.168		9	814.734	2972.92	2560.21		16	214.228	379.998	3961.07
4	396.593	457.024	653.411		10	785.599	1751.48	3019.33		17	536.453	1998.86	5324.75
5	399.032	411.298	447.66		11	887.25	1192.01	2390.74		18	387.833	856.045	742.775
6	452.515	573.869	473.328		12	612.88	2257.51	1718.65		19	1127.46	1228.95	3206.38
					13	522.092	1065.97	1489.41		20	346.593	691.482	1047.02

## Sheet: Left Ventricle
hyaluronic acid (pg ml-1)
no LPS	BLH	3h	6h		LTV	BLH	3h	6h		HTV	BLH	3h	6h
1	307.112	438.45	392.276		7	348.705	2852.9	2366.96		14	297.907	538.162	707.484
2	275.284	352.115	610.778		8	667.707	1390.04	933.954		15	387.236	854.433	749.127
3	379.223	388.661	675.276		9	1033.41	2957.58	2154.63		16	202.742	393.573	2906.28
4	340.702	422.74	591.681		10	708.237	1782.44	3775.04		17	487.253	2179.61	2681.8
5	426.938	436.94	457.539		11	696.049	892.78	1337.5		18	356.762	1136.6	674.321
6	426.267	548.561	435.832		12	673.871	2632.48	1233.73		19	1064.03	1235.72	2796.27
					13	481.57	848.616	1456.02		20	388.843	759.528	1129.55

## Sheet: Jugular Vein
hyaluronic acid (pg ml-1)
no LPS	BLH	3h	6h		LTV	BLH	3h	6h		HTV	BLH	3h	6h
1	303.831	385.239	440.177		7	293.746	1396.59	971.962		14	430.941	551.615	714.93
2	318.851	338.194	800.917		8	744.405	1065.1	916.225		15	354.805	739.648	868.985
3	418.005	374.06	644.176		9	341.638	332.968	825.038		16	235.904	374.347	4335.83
4	350.927	427.526	672.389		10	1058.54	2122.23	2394.81		17	585.569	1935.89	3014.18
5	439.785	487.574	558.366		11	947.655	690.895	1390.87		18	371.165	975.112	1086.96
6	474.593	564.645	566.252		12	701.392	2443.51	1352.1		19	1285.25	1319.81	4333.22
					13	470.591	873.911	1608.78		20	415.897	667.687	1126.55

## Sheet: Carotid Artery
hyaluronic acid (pg ml-1)
no LPS	BLH	3h	6h		LTV	BLH	3h	6h		HTV	BLH	3h	6h
1	275.5	366.752	485.071		7	386.51	2839.01	3934.73		14	326.762	588.826	696.293
2	251.279	309.33	838.799		8	713.135	1322.32	927.28		15	374.508	857.372	786.702
3	396.89	362.925	660.452		9	946.956	2791.68	3375.74		16	247.821	362.752	5065.75
4	353.309	418.772	686.467		10	708.953	1660.43	4300.01		17	521.063	1885.17	4176.74
5	376.867	426.077	537.292		11	1386.77	711.68	1580.74		18	294.444	887.954	1090.98
6	457.313	547.013	515.203		12	708.133	2409.99	1179.78		19	1276.9	1183.64	3257.31
					13	568.031	975.344	1277.56		20	390.857	683.286	881.889
